# Supplementary material for: Yeast Associated with Rice Phylloplane and Their Contribution to Control of Rice Sheath Blight Disease
Source: PubMed Central journal article supplement (PMC7142645; doi:10.3390/microorganisms8030362), 2020-03-03
Supplement: microorganisms-08-00362-s001.pdf [file microorganisms-08-00362-s001.pdf]

**Table S1.** Sequence similarity analysis of the D1/D2 domain of rice phylloplane yeasts and their closely related species.

| Yeast strain | GenBank accession no. | Closest species                               | Nucleotide substitutions/gap/ total nt | % identity | Identification                                                 |
|--------------|-----------------------|-----------------------------------------------|----------------------------------------|------------|----------------------------------------------------------------|
| DMKU-RP02    | LC486512              | <i>Saitozyma flava</i> (AF075497)             | 0/0/581                                | 100        | <i>Saitozyma flava</i>                                         |
| DMKU-RP03    | LC498132              | <i>Debaryomyces nepalensis</i> (U45839)       | 0/0/524                                | 100        | <i>Debaryomyces nepalensis</i>                                 |
| DMKU-RP04    | LC498133              | <i>Wickerhamomyces anomalus</i> (U74592)      | 0/0/479                                | 100        | <i>Wickerhamomyces anomalus</i>                                |
| DMKU-RP06    | LC498134              | <i>Kodamaea ohmeri</i> (U45702)               | 0/0/441                                | 100        | <i>Kodamaea ohmeri</i>                                         |
| DMKU-RP07    | LC498135              | <i>Meyerozyma caribbica</i> (AY187283)        | 0/0/476                                | 100        | <i>Meyerozyma caribbica</i>                                    |
| DMKU-RP08    | LC498136              | <i>Rhodotorula taiwanensis</i> (GU646863)     | 0/0/525                                | 100        | <i>Rhodotorula taiwanensis</i>                                 |
| DMKU-RP09    | LC498137              | <i>Dirkmeia churashimaensis</i> (AB548955)    | 0/0/507                                | 100        | <i>Dirkmeia churashimaensis</i>                                |
| DMKU-RP11    | LC486506              | <i>Rhodotorula taiwanensis</i> (GU646863)     | 2/0/538                                | 99.6       | <i>Rhodotorula taiwanensis</i>                                 |
| DMKU-RP12    | LC498138              | <i>Moesziomyces antarcticus</i> (KY108571)    | 0/0/545                                | 100        | <i>Moesziomyces antarcticus</i>                                |
| DMKU-RP14    | LC498139              | <i>Candida tropicalis</i> (U45749)            | 0/0/570                                | 100        | <i>Candida tropicalis</i>                                      |
| DMKU-RP15    | LC498140              | <i>Candida tropicalis</i> (U45749)            | 0/0/530                                | 100        | <i>Candida tropicalis</i>                                      |
| DMKU-RP16    | LC498141              | <i>Candida maltosa</i> (U45745)               | 0/0/452                                | 100        | <i>Candida maltosa</i>                                         |
| DMKU-RP18    | LC498142              | <i>Kodamaea ohmeri</i> (U45702)               | 0/0/444                                | 100        | <i>Kodamaea ohmeri</i>                                         |
| DMKU-RP20    | LC498143              | <i>Papiliotrema aspenensis</i> (KC469778)     | 1/0/514                                | 99.0       | <i>Papiliotrema aspenensis</i>                                 |
| DMKU-RP22    | LC498144              | <i>Moesziomyces antarcticus</i> (KY108571)    | 0/0/545                                | 100        | <i>Moesziomyces antarcticus</i>                                |
| DMKU-RP23    | LC498145              | <i>Candida maltosa</i> (U45745)               | 0/0/452                                | 100        | <i>Candida maltosa</i>                                         |
| DMKU-RP24    | LC498146              | <i>Kodamaea ohmeri</i> (U45702)               | 1/0/447                                | 99.8       | <i>Kodamaea ohmeri</i>                                         |
| DMKU-RP25    | LC498147              | <i>Wickerhamomyces anomalus</i> (U74592)      | 1/0/527                                | 99.8       | <i>Wickerhamomyces anomalus</i>                                |
| DMKU-RP26    | LC498148              | <i>Meyerozyma guilliermondii</i> (U45709)     | 3/0/471                                | 99.4       | <i>Meyerozyma guilliermondii</i>                               |
| DMKU-RP27    | LC498149              | <i>Dirkmeia churashimaensis</i> (AB548955)    | 1/0/546                                | 99.8       | <i>Dirkmeia churashimaensis</i>                                |
| DMKU-RP28    | LC498150              | <i>Moesziomyces antarcticus</i> (KY108571)    | 0/0/545                                | 100        | <i>Moesziomyces antarcticus</i>                                |
| DMKU-RP29    | LC486509              | <i>Rhodotorula toruloides</i> (AF070426)      | 5/0/556                                | 99.1       | Potential new species closest to <i>Rhodotorula toruloides</i> |
| DMKU-RP30    | LC498151              | <i>Occultifur plantarum</i> (LC158346)        | 0/0/427                                | 100        | <i>Occultifur plantarum</i>                                    |
| DMKU-RP31    | AB920307              | <i>Torulaspora indica</i> (NG_058414)         | 2/0/516                                | 99.6       | <i>Torulaspora indica</i>                                      |
| DMKU-RP32    | LC498152              | <i>Rhodotorula taiwanensis</i> (GU646863)     | 0/1/474                                | 99.8       | <i>Rhodotorula taiwanensis</i>                                 |
| DMKU-RP33    | LC498153              | <i>Symmetrospora vermiculata</i> (AF460176)   | 1/0/553                                | 99.8       | <i>Symmetrospora vermiculata</i>                               |
| DMKU-RP34    | LC498154              | <i>Kodamaea ohmeri</i> (U45702)               | 2/1/449                                | 99.3       | <i>Kodamaea ohmeri</i>                                         |
| DMKU-RP35    | LC498155              | <i>Torulaspora indica</i> (NG_058414)         | 1/0/458                                | 99.8       | <i>Torulaspora indica</i>                                      |
| DMKU-RP37    | LC486507              | <i>Rhodotorula taiwanensis</i> (GU646863)     | 2/1/503                                | 99.4       | <i>Rhodotorula taiwanensis</i>                                 |
| DMKU-RP38    | LC486508              | <i>Rhodotorula toruloides</i> (AF070426)      | 3/1/559                                | 99.3       | <i>Rhodotorula toruloides</i>                                  |
| DMKU-RP39    | LC498156              | <i>Moesziomyces parantarcticus</i> (AB089357) | 0/0/526                                | 100        | <i>Moesziomyces parantarcticus</i>                             |
| DMKU-RP40    | LC498157              | <i>Hannaella sinensis</i> (NG_042362)         | 0/0/549                                | 100        | <i>Hannaella sinensis</i>                                      |
| DMKU-RP42    | LC498158              | <i>Meyerozyma caribbica</i> (AY187283)        | 0/0/476                                | 100        | <i>Meyerozyma caribbica</i>                                    |
| DMKU-RP44    | LC498159              | <i>Kodamaea ohmeri</i> (U45702)               | 0/0/436                                | 100        | <i>Kodamaea ohmeri</i>                                         |
| DMKU-RP45    | AB920308              | <i>Hannaella sinensis</i> (NG_042362)         | 0/0/531                                | 100        | <i>Hannaella sinensis</i>                                      |
| DMKU-RP47    | LC498160              | <i>Meyerozyma caribbica</i> (AY187283)        | 0/0/476                                | 100        | <i>Meyerozyma caribbica</i>                                    |
| DMKU-RP48    | LC498161              | <i>Occultifur plantarum</i> (LC158346)        | 0/0/469                                | 100        | <i>Occultifur plantarum</i>                                    |
| DMKU-RP49    | LC498162              | <i>Meyerozyma caribbica</i> (AY187283)        | 0/0/373                                | 100        | <i>Meyerozyma caribbica</i>                                    |

Table S1. *continued.*

| Yeast strain | GenBank accession no. | Closest species                               | Nucleotide substitutions/gap/ total nt | % identity | Identification                                                 |
|--------------|-----------------------|-----------------------------------------------|----------------------------------------|------------|----------------------------------------------------------------|
| DMKU-RP50    | LC498163              | <i>Rhodotorula toruloides</i> (AF070426)      | 0/0/393                                | 100        | <i>Rhodotorula toruloides</i>                                  |
| DMKU-RP51    | LC498164              | <i>Meyerozyma caribbica</i> (AY187283)        | 0/0/373                                | 100        | <i>Meyerozyma caribbica</i>                                    |
| DMKU-RP52    | LC498165              | <i>Dirkmeia churashimaensis</i> (AB548955)    | 0/0/545                                | 100        | <i>Dirkmeia churashimaensis</i>                                |
| DMKU-RP53    | LC486510              | <i>Rhodotorula toruloides</i> (AF070426)      | 5/0/577                                | 99.1       | Potential new species closest to <i>Rhodotorula toruloides</i> |
| DMKU-RP54    | LC498166              | <i>Hannaella sinensis</i> (NG_042362)         | 0/0/445                                | 100        | <i>Hannaella sinensis</i>                                      |
| DMKU-RP55    | LC498167              | <i>Meyerozyma caribbica</i> (AY187283)        | 0/1/477                                | 99.8       | <i>Meyerozyma caribbica</i>                                    |
| DMKU-RP57    | LC498168              | <i>Kodamaea ohmeri</i> (U45702)               | 0/0/469                                | 98.9       | <i>Kodamaea ohmeri</i>                                         |
| DMKU-RP58    | LC498169              | <i>Symmetrospora vermiculata</i> (AF460176)   | 1/0/553                                | 99.8       | <i>Symmetrospora vermiculata</i>                               |
| DMKU-RP61    | LC498170              | <i>Rhodotorula taiwanensis</i> (GU646863)     | 0/1/556                                | 99.8       | <i>Rhodotorula taiwanensis</i>                                 |
| DMKU-RP62    | LC498171              | <i>Dirkmeia churashimaensis</i> (AB548955)    | 0/0/507                                | 100        | <i>Dirkmeia churashimaensis</i>                                |
| DMKU-RP63    | LC498172              | <i>Moesziomyces antarcticus</i> (KY108571)    | 0/2/583                                | 99.7       | <i>Moesziomyces antarcticus</i>                                |
| DMKU-RP64    | LC498173              | <i>Meyerozyma caribbica</i> (AY187283)        | 1/0/471                                | 99.8       | <i>Meyerozyma caribbica</i>                                    |
| DMKU-RP66    | LC498174              | <i>Moesziomyces antarcticus</i> (KY108571)    | 0/0/545                                | 100        | <i>Moesziomyces antarcticus</i>                                |
| DMKU-RP68    | LC498175              | <i>Rhodotorula mucilaginosa</i> (AF070432)    | 1/0/563                                | 99.8       | <i>Rhodotorula mucilaginosa</i>                                |
| DMKU-RP70    | LC498176              | <i>Sporobolomyces blumeae</i> (AY213010)      | 1/0/528                                | 99.8       | <i>Sporobolomyces blumeae</i>                                  |
| DMKU-RP71    | LC498177              | <i>Moesziomyces antarcticus</i> (KY108571)    | 1/1/581                                | 99.7       | <i>Moesziomyces antarcticus</i>                                |
| DMKU-RP72    | NG_060619             | <i>Hannaella siamensis</i> (AB922844)         | 0/0/597                                | 100        | <i>Hannaella siamensis</i> <sup>a</sup>                        |
| DMKU-RP74    | LC498265              | <i>Moesziomyces antarcticus</i> (KY108571)    | 0/0/611                                | 100        | <i>Moesziomyces antarcticus</i>                                |
| DMKU-RP76    | LC498266              | <i>Pseudozyma hubeiensis</i> (DQ008953)       | 0/0/566                                | 100        | <i>Pseudozyma hubeiensis</i>                                   |
| DMKU-RP77    | LC498267              | <i>Hannaella phetchabunensis</i> (AB922849)   | 0/0/597                                | 100        | <i>Hannaella phetchabunensis</i>                               |
| DMKU-RP79    | LC498268              | <i>Dirkmeia churashimaensis</i> (AB548955)    | 1/0/588                                | 99.8       | <i>Dirkmeia churashimaensis</i>                                |
| DMKU-RP80    | LC498269              | <i>Moesziomyces antarcticus</i> (KY108571)    | 1/1/591                                | 99.7       | <i>Moesziomyces antarcticus</i>                                |
| DMKU-RP81    | LC498270              | <i>Dirkmeia churashimaensis</i> (AB548955)    | 0/0/577                                | 100        | <i>Dirkmeia churashimaensis</i>                                |
| DMKU-RP82    | LC498271              | <i>Moesziomyces antarcticus</i> (KY108571)    | 0/0/611                                | 100        | <i>Moesziomyces antarcticus</i>                                |
| DMKU-RP83    | LC498272              | <i>Rhodotorula mucilaginosa</i> (AF070432)    | 0/0/488                                | 99.6       | <i>Rhodotorula mucilaginosa</i>                                |
| DMKU-RP84    | LC498273              | <i>Rhodotorula taiwanensis</i> (GU646863)     | 1/0/574                                | 99.8       | <i>Rhodotorula taiwanensis</i>                                 |
| DMKU-RP85    | LC498274              | <i>Sporidiobolus pararoseus</i> (AF070437)    | 0/0/535                                | 100        | <i>Sporidiobolus pararoseus</i>                                |
| DMKU-RP86    | LC498275              | <i>Dirkmeia churashimaensis</i> (AB548955)    | 1/1/579                                | 99.7       | <i>Dirkmeia churashimaensis</i>                                |
| DMKU-RP88    | LC498276              | <i>Papiliotrema rajasthanensis</i> (AM262324) | 1/1/565                                | 99.6       | <i>Papiliotrema rajasthanensis</i>                             |
| DMKU-RP89    | LC498277              | <i>Rhodotorula taiwanensis</i> (GU646863)     | 1/4/543                                | 99.1       | <i>Rhodotorula taiwanensis</i>                                 |
| DMKU-RP90    | LC498278              | <i>Dirkmeia churashimaensis</i> (AB548955)    | 0/1/532                                | 99.8       | <i>Dirkmeia churashimaensis</i>                                |
| DMKU-RP91    | LC498279              | <i>Meyerozyma caribbica</i> (AY187283)        | 0/0/525                                | 100        | <i>Meyerozyma caribbica</i>                                    |
| DMKU-RP93    | LC498280              | <i>Moesziomyces antarcticus</i> (KY108571)    | 0/0/569                                | 100        | <i>Moesziomyces antarcticus</i>                                |
| DMKU-RP94    | LC498281              | <i>Rhodotorula taiwanensis</i> (GU646863)     | 1/3/541                                | 99.3       | <i>Rhodotorula taiwanensis</i>                                 |
| DMKU-RP96    | LC498282              | <i>Rhodotorula paludigena</i> (AF070424)      | 0/0/539                                | 100        | <i>Rhodotorula paludigena</i>                                  |
| DMKU-RP97    | LC498283              | <i>Moesziomyces antarcticus</i> (KY108571)    | 0/1/585                                | 100        | <i>Moesziomyces antarcticus</i>                                |
| DMKU-RP98    | LC498284              | <i>Sporobolomyces blumeae</i> (AY213010)      | 0/0/546                                | 100        | <i>Sporobolomyces blumeae</i>                                  |
| DMKU-RP99    | LC498285              | <i>Papiliotrema rajasthanensis</i> (AM262324) | 0/2/561                                | 99.6       | <i>Papiliotrema rajasthanensis</i>                             |

Table S1. continued.

| Yeast strain | GenBank accession no. | Closest species                               | Nucleotide substitutions/gap/ total nt | % identity | Identification                          |
|--------------|-----------------------|-----------------------------------------------|----------------------------------------|------------|-----------------------------------------|
| DMKU-RP100   | LC498286              | <i>Moesziomyces antarcticus</i> (KY108571)    | 1/0/569                                | 99.8       | <i>Moesziomyces antarcticus</i>         |
| DMKU-RP101   | LC498287              | <i>Moesziomyces antarcticus</i> (KY108571)    | 0/2/576                                | 99.7       | <i>Moesziomyces antarcticus</i>         |
| DMKU-RP103   | LC498288              | <i>Dirkmeia churashimaensis</i> (AB548955)    | 0/2/570                                | 99.6       | <i>Dirkmeia churashimaensis</i>         |
| DMKU-RP105   | AB920309              | <i>Rhodotorula taiwanensis</i> (GU646863)     | 1/0/519                                | 99.8       | <i>Rhodotorula taiwanensis</i>          |
| DMKU-RP106   | LC498289              | <i>Meyerozyma caribbica</i> (AY187283)        | 0/0/483                                | 100        | <i>Meyerozyma caribbica</i>             |
| DMKU-RP107   | LC498290              | <i>Moesziomyces antarcticus</i> (KY108571)    | 0/2/572                                | 99.7       | <i>Moesziomyces antarcticus</i>         |
| DMKU-RP108   | LC498291              | <i>Rhodotorula mucilaginosa</i> (AF070432)    | 1/1/532                                | 99.6       | <i>Rhodotorula mucilaginosa</i>         |
| DMKU-RP109   | AB922845              | <i>Hannaella siamensis</i> (AB922844)         | 0/0/557                                | 99.6       | <i>Hannaella siamensis</i> <sup>a</sup> |
| DMKU-RP111   | LC498292              | <i>Dirkmeia churashimaensis</i> (AB548955)    | 0/0/549                                | 100        | <i>Dirkmeia churashimaensis</i>         |
| DMKU-RP112   | LC498293              | <i>Moesziomyces antarcticus</i> (KY108571)    | 0/0/562                                | 100        | <i>Moesziomyces antarcticus</i>         |
| DMKU-RP113   | LC498294              | <i>Sakaguchia oryzae</i> (AY335161)           | 1/0/490                                | 99.8       | <i>Sakaguchia oryzae</i>                |
| DMKU-RP116   | LC498295              | <i>Rhodotorula paludigena</i> (AF070424)      | 1/0/543                                | 99.8       | <i>Rhodotorula paludigena</i>           |
| DMKU-RP117   | LC498296              | <i>Dirkmeia churashimaensis</i> (AB548955)    | 0/0/544                                | 100        | <i>Dirkmeia churashimaensis</i>         |
| DMKU-RP118   | LC498297              | <i>Moesziomyces antarcticus</i> (KY108571)    | 0/0/568                                | 100        | <i>Moesziomyces antarcticus</i>         |
| DMKU-RP119   | AB922846              | <i>Hannaella siamensis</i> (AB922844)         | 0/0/597                                | 100        | <i>Hannaella siamensis</i> <sup>a</sup> |
| DMKU-RP120   | LC498298              | <i>Papiliotrema rajasthanensis</i> (AM262324) | 0/1/571                                | 99.8       | <i>Papiliotrema rajasthanensis</i>      |
| DMKU-RP121   | LC498299              | <i>Candida parapsilosis</i> (U45754)          | 1/0/524                                | 99.8       | <i>Candida parapsilosis</i>             |
| DMKU-RP122   | LC498300              | <i>Moesziomyces antarcticus</i> (KY108571)    | 0/1/558                                | 99.8       | <i>Moesziomyces antarcticus</i>         |
| DMKU-RP123   | LC498301              | <i>Dirkmeia churashimaensis</i> (AB548955)    | 0/0/578                                | 100        | <i>Dirkmeia churashimaensis</i>         |
| DMKU-RP125   | LC498302              | <i>Papiliotrema aspenensis</i> (KC469778)     | 0/1/505                                | 99.8       | <i>Papiliotrema aspenensis</i>          |
| DMKU-RP126   | LC498303              | <i>Jaminaea angkorensis</i> (EU587489)        | 1/1/556                                | 99.6       | <i>Jaminaea angkorensis</i>             |
| DMKU-RP127   | LC498304              | <i>Moesziomyces antarcticus</i> (KY108571)    | 0/1/567                                | 99.8       | <i>Moesziomyces antarcticus</i>         |
| DMKU-RP128   | AB920310              | <i>Saitozyma flava</i> (AF075497)             | 0/0/581                                | 100        | <i>Saitozyma flava</i>                  |
| DMKU-RP129   | LC498305              | <i>Sakaguchia oryzae</i> (AY335161)           | 1/0/505                                | 99.6       | <i>Sakaguchia oryzae</i>                |
| DMKU-RP130   | LC498306              | <i>Moesziomyces antarcticus</i> (KY108571)    | 0/0/553                                | 100        | <i>Moesziomyces antarcticus</i>         |
| DMKU-RP132   | LC498307              | <i>Papiliotrema flavescens</i> (AB035042)     | 0/0/553                                | 100        | <i>Papiliotrema flavescens</i>          |
| DMKU-RP133   | LC498308              | <i>Moesziomyces antarcticus</i> (KY108571)    | 0/0/579                                | 100        | <i>Moesziomyces antarcticus</i>         |
| DMKU-RP134   | LC498309              | <i>Sporidiobolus pararoseus</i> (AF070437)    | 0/1/547                                | 99.8       | <i>Sporidiobolus pararoseus</i>         |
| DMKU-RP135   | LC498310              | <i>Moesziomyces antarcticus</i> (KY108571)    | 0/0/580                                | 100        | <i>Moesziomyces antarcticus</i>         |
| DMKU-RP137   | LC498311              | <i>Papiliotrema laurentii</i> (AF075469)      | 1/1/566                                | 99.6       | <i>Papiliotrema laurentii</i>           |
| DMKU-RP138   | LC498312              | <i>Rhodotorula paludigena</i> (AF070424)      | 0/1/519                                | 100        | <i>Rhodotorula paludigena</i>           |
| DMKU-RP140   | LC498313              | <i>Papiliotrema flavescens</i> (AB035042)     | 0/1/569                                | 100        | <i>Papiliotrema flavescens</i>          |
| DMKU-RP142   | LC498314              | <i>Papiliotrema flavescens</i> (AB035042)     | 0/1/540                                | 99.8       | <i>Papiliotrema flavescens</i>          |
| DMKU-RP144   | LC498315              | <i>Moesziomyces antarcticus</i> (KY108571)    | 0/0/553                                | 100        | <i>Moesziomyces antarcticus</i>         |
| DMKU-RP146   | LC498316              | <i>Sporobolomyces blumeae</i> (AY213010)      | 1/0/542                                | 99.8       | <i>Sporobolomyces blumeae</i>           |
| DMKU-RP147   | LC498317              | <i>Candida parapsilosis</i> (U45754)          | 0/0/519                                | 100        | <i>Candida parapsilosis</i>             |
| DMKU-RP148   | LC498318              | <i>Papiliotrema japonica</i> (AF444760)       | 0/2/578                                | 99.7       | <i>Papiliotrema japonica</i>            |
| DMKU-RP149   | LC498319              | <i>Dirkmeia churashimaensis</i> (AB548955)    | 0/1/554                                | 100        | <i>Dirkmeia churashimaensis</i>         |

Table S1. continued.

| Yeast strain | GenBank accession no. | Closest species                             | Nucleotide substitutions/gap/ total nt | % identity | Identification                   |
|--------------|-----------------------|---------------------------------------------|----------------------------------------|------------|----------------------------------|
| DMKU-RP150   | LC498320              | <i>Dirkmeia churashimaensis</i> (AB548955)  | 0/0/578                                | 100        | <i>Dirkmeia churashimaensis</i>  |
| DMKU-RP151   | LC498321              | <i>Moesziomyces antarcticus</i> (KY108571)  | 1/0/581                                | 99.8       | <i>Moesziomyces antarcticus</i>  |
| DMKU-RP152   | LC498322              | <i>Papiliotrema siamense</i> (AB909023)     | 0/0/556                                | 100        | <i>Papiliotrema siamense</i>     |
| DMKU-RP153   | LC498323              | <i>Rhodotorula taiwanensis</i> (GU646863)   | 0/1/493                                | 99.8       | <i>Rhodotorula taiwanensis</i>   |
| DMKU-RP154   | LC498324              | <i>Rhodotorula taiwanensis</i> (GU646863)   | 1/0/535                                | 99.8       | <i>Rhodotorula taiwanensis</i>   |
| DMKU-RP155   | LC498325              | <i>Candida diddensiae</i> (U45750)          | 0/1/509                                | 99.8       | <i>Candida diddensiae</i>        |
| DMKU-RP156   | LC498326              | <i>Papiliotrema japonica</i> (AF444760)     | 0/0/557                                | 100        | <i>Papiliotrema japonica</i>     |
| DMKU-RP158   | LC486511              | <i>Rhodotorula mucilaginoso</i> (AF070432)  | 2/0/534                                | 99.6       | <i>Rhodotorula mucilaginoso</i>  |
| DMKU-RP160   | LC498327              | <i>Papiliotrema japonica</i> (AF444760)     | 0/0/558                                | 100        | <i>Papiliotrema japonica</i>     |
| DMKU-RP161   | LC498328              | <i>Moesziomyces antarcticus</i> (KY108571)  | 1/1/555                                | 99.6       | <i>Moesziomyces antarcticus</i>  |
| DMKU-RP162   | LC498329              | <i>Meyerozyma caribbica</i> (AY187283)      | 1/0/521                                | 99.8       | <i>Meyerozyma caribbica</i>      |
| DMKU-RP164   | LC498330              | <i>Dirkmeia churashimaensis</i> (AB548955)  | 0/1/578                                | 99.8       | <i>Dirkmeia churashimaensis</i>  |
| DMKU-RP165   | LC498331              | <i>Papiliotrema japonica</i> (AF444760)     | 0/0/564                                | 100        | <i>Papiliotrema japonica</i>     |
| DMKU-RP166   | LC498332              | <i>Rhodotorula taiwanensis</i> (GU646863)   | 1/0/535                                | 99.8       | <i>Rhodotorula taiwanensis</i>   |
| DMKU-RP167   | LC486505              | <i>Moesziomyces antarcticus</i> (KY108571)  | 3/0/541                                | 99.4       | <i>Moesziomyces antarcticus</i>  |
| DMKU-RP168   | AB920311              | <i>Meyerozyma caribbica</i> (AY187283)      | 2/0/510                                | 99.6       | <i>Meyerozyma caribbica</i>      |
| DMKU-RP169   | LC498333              | <i>Candida parapsilosis</i> (U45754)        | 0/0/516                                | 100        | <i>Candida parapsilosis</i>      |
| DMKU-RP170   | LC498334              | <i>Hannaella phetchabunensis</i> (AB922849) | 0/0/553                                | 100        | <i>Hannaella phetchabunensis</i> |
| DMKU-RP172   | LC498335              | <i>Sporobolomyces blumeae</i> (AY213010)    | 0/1/548                                | 99.8       | <i>Sporobolomyces blumeae</i>    |
| DMKU-RP173   | LC498336              | <i>Sporobolomyces blumeae</i> (AY213010)    | 0/0/542                                | 100        | <i>Sporobolomyces blumeae</i>    |
| DMKU-RP174   | LC498337              | <i>Moesziomyces antarcticus</i> (KY108571)  | 1/1/470                                | 99.6       | <i>Moesziomyces antarcticus</i>  |
| DMKU-RP176   | LC498338              | <i>Papiliotrema japonica</i> (AF444760)     | 0/0/603                                | 100        | <i>Papiliotrema japonica</i>     |
| DMKU-RP177   | LC498339              | <i>Rhodotorula taiwanensis</i> (GU646863)   | 0/0/474                                | 100        | <i>Rhodotorula taiwanensis</i>   |
| DMKU-RP178   | LC498340              | <i>Papiliotrema laurentii</i> (AF075469)    | 1/1/566                                | 99.6       | <i>Papiliotrema laurentii</i>    |
| DMKU-RP180   | LC498341              | <i>Moesziomyces antarcticus</i> (KY108571)  | 0/0/545                                | 100        | <i>Moesziomyces antarcticus</i>  |
| DMKU-RP182   | LC498342              | <i>Moesziomyces antarcticus</i> (KY108571)  | 1/0/553                                | 99.8       | <i>Moesziomyces antarcticus</i>  |
| DMKU-RP183   | LC498343              | <i>Sporobolomyces blumeae</i> (AY213010)    | 0/0/520                                | 100        | <i>Sporobolomyces blumeae</i>    |
| DMKU-RP184   | LC498344              | <i>Papiliotrema aspenensis</i> (KC469778)   | 1/0/514                                | 99.8       | <i>Papiliotrema aspenensis</i>   |
| DMKU-RP186   | LC498345              | <i>Candida parapsilosis</i> (U45754)        | 2/0/524                                | 99.6       | <i>Candida parapsilosis</i>      |
| DMKU-RP187   | LC498346              | <i>Rhodotorula taiwanensis</i> (GU646863)   | 0/1/536                                | 99.8       | <i>Rhodotorula taiwanensis</i>   |
| DMKU-RP188   | LC498347              | <i>Papiliotrema japonica</i> (AF444760)     | 0/0/484                                | 100        | <i>Papiliotrema japonica</i>     |
| DMKU-RP190   | LC498348              | <i>Sakaguchia oryzae</i> (AY335161)         | 0/1/563                                | 99.8       | <i>Sakaguchia oryzae</i>         |
| DMKU-RP192   | LC498349              | <i>Hannaella siamensis</i> (AB922844)       | 0/0/571                                | 100        | <i>Hannaella siamensis</i>       |
| DMKU-RP194   | LC498350              | <i>Papiliotrema japonica</i> (AF444760)     | 0/0/550                                | 100        | <i>Papiliotrema japonica</i>     |
| DMKU-RP195   | LC498351              | <i>Dirkmeia churashimaensis</i> (AB548955)  | 0/0/553                                | 100        | <i>Dirkmeia churashimaensis</i>  |
| DMKU-RP196   | LC498352              | <i>Dirkmeia churashimaensis</i> (AB548955)  | 0/0/468                                | 100        | <i>Dirkmeia churashimaensis</i>  |
| DMKU-RP198   | LC498353              | <i>Rhodotorula paludigena</i> (AF070424)    | 0/0/581                                | 100        | <i>Rhodotorula paludigena</i>    |
| DMKU-RP199   | LC498354              | <i>Dirkmeia churashimaensis</i> (AB548955)  | 1/0/508                                | 99.8       | <i>Dirkmeia churashimaensis</i>  |

Table S1. *continued.*

| Yeast strain | GenBank accession no. | Closest species                               | Nucleotide substitutions/gap/ total nt | % identity | Identification                     |
|--------------|-----------------------|-----------------------------------------------|----------------------------------------|------------|------------------------------------|
| DMKU-RP202   | LC498355              | <i>Moesziomyces antarcticus</i> (KY108571)    | 0/0/546                                | 100        | <i>Moesziomyces antarcticus</i>    |
| DMKU-RP204   | LC498356              | <i>Moesziomyces aphidis</i> (AB089363)        | 0/0/333                                | 100        | <i>Moesziomyces aphidis</i>        |
| DMKU-RP205   | LC498357              | <i>Moesziomyces antarcticus</i> (KY108571)    | 0/0/546                                | 100        | <i>Moesziomyces antarcticus</i>    |
| DMKU-RP209   | LC498358              | <i>Moesziomyces antarcticus</i> (KY108571)    | 0/0/545                                | 100        | <i>Moesziomyces antarcticus</i>    |
| DMKU-RP212   | LC498359              | <i>Moesziomyces antarcticus</i> (KY108571)    | 0/2/555                                | 99.6       | <i>Moesziomyces antarcticus</i>    |
| DMKU-RP214   | LC498360              | <i>Moesziomyces antarcticus</i> (KY108571)    | 0/0/569                                | 100        | <i>Moesziomyces antarcticus</i>    |
| DMKU-RP215   | LC498361              | <i>Hannaella pagnoccae</i> (FJ828959)         | 1/1/543                                | 99.6       | <i>Hannaella pagnoccae</i>         |
| DMKU-RP218   | LC498362              | <i>Papiliotrema rajasthanensis</i> (AM262324) | 1/0/553                                | 99.8       | <i>Papiliotrema rajasthanensis</i> |
| DMKU-RP220   | LC498363              | <i>Sakaguchia oryzae</i> (AY335161)           | 1/0/462                                | 99.8       | <i>Sakaguchia oryzae</i>           |
| DMKU-RP221   | LC498364              | <i>Dirkmeia churashimaensis</i> (AB548955)    | 0/0/519                                | 100        | <i>Dirkmeia churashimaensis</i>    |
| DMKU-RP223   | LC498365              | <i>Dirkmeia churashimaensis</i> (AB548955)    | 0/0/527                                | 100        | <i>Dirkmeia churashimaensis</i>    |
| DMKU-RP224   | LC498366              | <i>Moesziomyces antarcticus</i> (KY108571)    | 0/0/469                                | 100        | <i>Moesziomyces antarcticus</i>    |
| DMKU-RP227   | LC498367              | <i>Sporobolomyces carnicolor</i> (AY070008)   | 0/0/551                                | 100        | <i>Sporobolomyces carnicolor</i>   |
| DMKU-RP231   | LC498368              | <i>Moesziomyces antarcticus</i> (KY108571)    | 1/1/555                                | 99.6       | <i>Moesziomyces antarcticus</i>    |
| DMKU-RP232   | LC498369              | <i>Papiliotrema siamense</i> (AB909023)       | 0/0/556                                | 100        | <i>Papiliotrema siamense</i>       |
| DMKU-RP233   | AB920313              | <i>Kodamaea ohmeri</i> (U45702)               | 1/0/447                                | 99.8       | <i>Kodamaea ohmeri</i>             |
| DMKU-RP235   | LC498370              | <i>Rhodotorula taiwanensis</i> (GU646863)     | 0/0/509                                | 100        | <i>Rhodotorula taiwanensis</i>     |
| DMKU-RP237   | LC498371              | <i>Dirkmeia churashimaensis</i> (AB548955)    | 0/0/570                                | 100        | <i>Dirkmeia churashimaensis</i>    |
| DMKU-RP239   | LC498372              | <i>Moesziomyces antarcticus</i> (KY108571)    | 0/0/280                                | 100        | <i>Moesziomyces antarcticus</i>    |
| DMKU-RP240   | LC498373              | <i>Sporobolomyces blumeae</i> (AY213010)      | 1/0/475                                | 99.8       | <i>Sporobolomyces blumeae</i>      |
| DMKU-RP242   | LC498374              | <i>Jaminaea angkorensis</i> (EU587489)        | 0/0/452                                | 100        | <i>Jaminaea angkorensis</i>        |
| DMKU-RP245   | LC498375              | <i>Dirkmeia churashimaensis</i> (AB548955)    | 0/0/527                                | 100        | <i>Dirkmeia churashimaensis</i>    |
| DMKU-RP246   | LC498376              | <i>Rhodotorula mucilaginoso</i> (AF070432)    | 1/0/498                                | 99.8       | <i>Rhodotorula mucilaginoso</i>    |
| DMKU-RP248   | LC498377              | <i>Moesziomyces antarcticus</i> (KY108571)    | 1/1/458                                | 99.6       | <i>Moesziomyces antarcticus</i>    |
| DMKU-RP251   | LC498378              | <i>Dirkmeia churashimaensis</i> (AB548955)    | 0/0/499                                | 100        | <i>Dirkmeia churashimaensis</i>    |
| DMKU-RP252   | LC498379              | <i>Rhodotorula taiwanensis</i> (GU646863)     | 1/0/509                                | 99.8       | <i>Rhodotorula taiwanensis</i>     |
| DMKU-RP253   | LC498380              | <i>Moesziomyces antarcticus</i> (KY108571)    | 0/0/436                                | 100        | <i>Moesziomyces antarcticus</i>    |
| DMKU-RP254   | LC498381              | <i>Moesziomyces antarcticus</i> (KY108571)    | 0/0/400                                | 100        | <i>Moesziomyces antarcticus</i>    |
| DMKU-RP258   | LC498382              | <i>Dirkmeia churashimaensis</i> (AB548955)    | 0/0/439                                | 100        | <i>Dirkmeia churashimaensis</i>    |
| DMKU-RP259   | LC498383              | <i>Rhodotorula taiwanensis</i> (GU646863)     | 1/1/535                                | 99.6       | <i>Rhodotorula taiwanensis</i>     |
| DMKU-RP261   | LC498384              | <i>Moesziomyces antarcticus</i> (KY108571)    | 0/0/289                                | 100        | <i>Moesziomyces antarcticus</i>    |
| DMKU-RP264   | LC498385              | <i>Papiliotrema japonica</i> (AF444760)       | 0/0/603                                | 100        | <i>Papiliotrema japonica</i>       |
| DMKU-RP266   | LC498386              | <i>Sporidiobolus pararoseus</i> (AF070437)    | 0/0/513                                | 100        | <i>Sporidiobolus pararoseus</i>    |
| DMKU-RP267   | LC498387              | <i>Rhodotorula taiwanensis</i> (GU646863)     | 1/0/489                                | 99.8       | <i>Rhodotorula taiwanensis</i>     |
| DMKU-RP269   | LC498388              | <i>Meyerozyma guilliermondii</i> (U45709)     | 1/0/459                                | 99.8       | <i>Meyerozyma guilliermondii</i>   |
| DMKU-RP273   | LC498389              | <i>Dirkmeia churashimaensis</i> (AB548955)    | 0/0/530                                | 100        | <i>Dirkmeia churashimaensis</i>    |
| DMKU-RP274   | LC498390              | <i>Sporobolomyces carnicolor</i> (AY070008)   | 0/0/449                                | 100        | <i>Sporobolomyces carnicolor</i>   |
| DMKU-RP276   | LC498391              | <i>Papiliotrema nemorosus</i> (AF472625)      | 1/0/360                                | 99.7       | <i>Papiliotrema nemorosus</i>      |

Table S1. *continued.*

| Yeast strain | GenBank accession no. | Closest species                               | Nucleotide substitutions/gap/ total nt | % identity | Identification                     |
|--------------|-----------------------|-----------------------------------------------|----------------------------------------|------------|------------------------------------|
| DMKU-RP279   | LC498392              | <i>Papiliotrema japonica</i> (AF444760)       | 0/0/536                                | 100        | <i>Papiliotrema japonica</i>       |
| DMKU-RP280   | LC498393              | <i>Sakaguchia oryzae</i> (AY335161)           | 1/0/483                                | 99.8       | <i>Sakaguchia oryzae</i>           |
| DMKU-RP281   | LC498394              | <i>Sporobolomyces carnicolor</i> (AY070008)   | 1/0/478                                | 99.8       | <i>Sporobolomyces carnicolor</i>   |
| DMKU-RP282   | LC498395              | <i>Rhodotorula taiwanensis</i> (GU646863)     | 1/0/574                                | 99.8       | <i>Rhodotorula taiwanensis</i>     |
| DMKU-RP293   | LC498396              | <i>Papiliotrema rajasthanensis</i> (AM262324) | 0/0/499                                | 100        | <i>Papiliotrema rajasthanensis</i> |
| DMKU-RP295   | LC498397              | <i>Sporobolomyces carnicolor</i> (AY070008)   | 0/0/390                                | 99.7       | <i>Sporobolomyces carnicolor</i>   |
| DMKU-RP297   | LC498398              | <i>Dirkmeia churashimaensis</i> (AB548955)    | 0/0/389                                | 100        | <i>Dirkmeia churashimaensis</i>    |
| DMKU-RP298   | LC498399              | <i>Papiliotrema flavescens</i> (AB035042)     | 0/0/428                                | 100        | <i>Papiliotrema flavescens</i>     |
| DMKU-RP299   | LC498400              | <i>Hannaella siamensis</i> (AB922844)         | 0/0/422                                | 100        | <i>Hannaella siamensis</i>         |
| DMKU-RP300   | LC498401              | <i>Candida parapsilosis</i> (U45754)          | 0/0/567                                | 100        | <i>Candida parapsilosis</i>        |
| DMKU-RP301   | AB920314              | <i>Rhodotorula paludigena</i> (AF070424)      | 0/0/399                                | 100        | <i>Rhodotorula paludigena</i>      |
| DMKU-RP302   | LC498402              | <i>Sporobolomyces nakasei</i> (KY109757)      | 1/0/410                                | 99.8       | <i>Sporobolomyces nakasei</i>      |
| DMKU-RP303   | LC498403              | <i>Moesziomyces antarcticus</i> (KY108571)    | 0/0/581                                | 100        | <i>Moesziomyces antarcticus</i>    |
| DMKU-RP305   | LC498404              | <i>Rhodotorula taiwanensis</i> (GU646863)     | 1/1/473                                | 99.6       | <i>Rhodotorula taiwanensis</i>     |
| DMKU-RP306   | LC498405              | <i>Papiliotrema flavescens</i> (AB035042)     | 0/0/339                                | 100        | <i>Papiliotrema flavescens</i>     |
| DMKU-RP307   | LC498406              | <i>Candida parapsilosis</i> (U45754)          | 2/0/511                                | 99.6       | <i>Candida parapsilosis</i>        |
| DMKU-RP309   | LC498407              | <i>Sporidiobolus pararoseus</i> (AF070437)    | 0/0/349                                | 100        | <i>Sporidiobolus pararoseus</i>    |
| YE-9         | LC498408              | <i>Rhodotorula taiwanensis</i> (GU646863)     | 1/0/574                                | 99.9       | <i>Rhodotorula taiwanensis</i>     |
| YE-11        | LC498409              | <i>Pseudozyma alboarmeniaca</i> (AB117961)    | 1/0/573                                | 99.8       | <i>Pseudozyma alboarmeniaca</i>    |
| YE-12        | LC498410              | <i>Dirkmeia churashimaensis</i> (AB548955)    | 0/0/532                                | 100        | <i>Dirkmeia churashimaensis</i>    |
| YE-14        | LC498411              | <i>Papiliotrema japonica</i> (AF444760)       | 0/0/603                                | 100        | <i>Papiliotrema japonica</i>       |
| YE-31        | LC498412              | <i>Pseudozyma alboarmeniaca</i> (AB117961)    | 0/1/573                                | 99.8       | <i>Pseudozyma alboarmeniaca</i>    |
| YE-32        | LC486515              | <i>Sporidiobolus pararoseus</i> (AF189977)    | 2/0/579                                | 99.7       | <i>Sporidiobolus pararoseus</i>    |
| YE-33        | LC498413              | <i>Sporobolomyces blumeae</i> (AB279628)      | 0/0/541                                | 100        | <i>Sporobolomyces blumeae</i>      |
| YE-36        | LC498414              | <i>Dirkmeia churashimaensis</i> (AB548955)    | 0/0/567                                | 100        | <i>Dirkmeia churashimaensis</i>    |
| YE-37        | LC498415              | <i>Candida tropicalis</i> (U45749)            | 0/0/576                                | 100        | <i>Candida tropicalis</i>          |
| YE-38        | LC498416              | <i>Moesziomyces antarcticus</i> (AB089359)    | 0/0/581                                | 100        | <i>Moesziomyces antarcticus</i>    |
| YE-39        | LC498417              | <i>Dirkmeia churashimaensis</i> (AB548955)    | 1/0/531                                | 99.8       | <i>Dirkmeia churashimaensis</i>    |
| YE-40        | LC498418              | <i>Moesziomyces antarcticus</i> (AB089359)    | 0/0/581                                | 100        | <i>Moesziomyces antarcticus</i>    |
| YE-42        | LC498419              | <i>Wickerhamomyces anomalus</i> (KY110078)    | 0/0/530                                | 100        | <i>Wickerhamomyces anomalus</i>    |
| YE-43        | LC498420              | <i>Papiliotrema siamense</i> (AB909023)       | 1/0/549                                | 99.8       | <i>Papiliotrema siamense</i>       |
| YE-57        | LC498421              | <i>Moesziomyces antarcticus</i> (AB089359)    | 0/0/581                                | 100        | <i>Moesziomyces antarcticus</i>    |
| YE-58        | LC498422              | <i>Hannaella sinensis</i> (NG_042362)         | 0/0/601                                | 100        | <i>Hannaella sinensis</i>          |
| YE-59        | LC498423              | <i>Sporobolomyces blumeae</i> (AB279628)      | 0/0/512                                | 100        | <i>Sporobolomyces blumeae</i>      |
| YE-60        | LC486516              | <i>Sporidiobolus pararoseus</i> (AF189977)    | 2/0/578                                | 99.8       | <i>Sporidiobolus pararoseus</i>    |
| YE-61        | LC498424              | <i>Moesziomyces antarcticus</i> (AB089359)    | 0/0/578                                | 100        | <i>Moesziomyces antarcticus</i>    |
| YE-62        | LC498425              | <i>Papiliotrema japonica</i> (AF444760)       | 0/0/603                                | 100        | <i>Papiliotrema japonica</i>       |
| YE-70        | LC498426              | <i>Sporobolomyces blumeae</i> (AB279628)      | 0/0/579                                | 100        | <i>Sporobolomyces blumeae</i>      |
| YE71         | LC486513              | <i>Dirkmeia churashimaensis</i> (AB548955)    | 3/2/569                                | 99.1       | <i>Dirkmeia churashimaensis</i>    |

Table S1. *continued.*

| Yeast strain | GenBank accession no. | Closest species                            | Nucleotide substitutions/gap/ total nt | % identity | Identification                          |
|--------------|-----------------------|--------------------------------------------|----------------------------------------|------------|-----------------------------------------|
| YE73         | LC498427              | <i>Moesziomyces antarcticus</i> (AB089359) | 0/0/581                                | 100        | <i>Moesziomyces antarcticus</i>         |
| YE-86        | LC498428              | <i>Ustilago siamensis</i> (AB117963)       | 0/0/573                                | 100        | <i>Ustilago siamensis</i>               |
| YE-87        | LC498429              | <i>Papiliotrema japonica</i> (AF444760)    | 0/0/604                                | 100        | <i>Papiliotrema japonica</i>            |
| YE-88        | LC498430              | <i>Rhodotorula taiwanensis</i> (GU646863)  | 0/0/574                                | 100        | <i>Rhodotorula taiwanensis</i>          |
| YE-89        | LC498431              | <i>Moesziomyces antarcticus</i> (AB089359) | 1/0/581                                | 99.8       | <i>Moesziomyces antarcticus</i>         |
| YE-91        | LC498432              | <i>Dirkmeia churashimaensis</i> (AB548955) | 0/0/567                                | 100        | <i>Dirkmeia churashimaensis</i>         |
| YE-102       | LC498433              | <i>Rhodotorula mucilaginoso</i> (AF070432) | 0/0/577                                | 100        | <i>Rhodotorula mucilaginoso</i>         |
| YE-104       | LC498434              | <i>Moesziomyces antarcticus</i> (AB089359) | 0/0/581                                | 100        | <i>Moesziomyces antarcticus</i>         |
| YE-105       | LC498435              | <i>Papiliotrema aspenensis</i> (KC469778)  | 1/0/567                                | 99.8       | <i>Papiliotrema aspenensis</i>          |
| YE-106       | LC498436              | <i>Ustilago siamensis</i> (AB117963)       | 0/0/575                                | 100        | <i>Ustilago siamensis</i>               |
| YE-107       | LC486517              | <i>Sporidiobolus pararoseus</i> (AF189977) | 3/0/577                                | 99.5       | <i>Sporidiobolus pararoseus</i>         |
| YE-111       | LC498437              | <i>Candida tropicalis</i> (U45749)         | 0/0/539                                | 100        | <i>Candida tropicalis</i>               |
| YE-112       | LC498438              | <i>Rhodotorula mucilaginoso</i> (AF070432) | 0/0/540                                | 100        | <i>Rhodotorula mucilaginoso</i>         |
| YE-113       | LC498439              | <i>Trichosporon insectorum</i> (AY520383)  | 0/0/589                                | 100        | <i>Trichosporon insectorum</i>          |
| YE-114       | LC498440              | <i>Moesziomyces antarcticus</i> (AB089359) | 0/0/574                                | 100        | <i>Moesziomyces antarcticus</i>         |
| YE-116       | LC498441              | <i>Trichosporon asahii</i> (AF105393)      | 0/0/566                                | 100        | <i>Trichosporon asahii</i>              |
| YE-121       | LC498442              | <i>Dirkmeia churashimaensis</i> (AB548955) | 0/0/578                                | 100        | <i>Dirkmeia churashimaensis</i>         |
| YE-122       | LC498443              | <i>Moesziomyces antarcticus</i> (AB089359) | 0/0/611                                | 100        | <i>Moesziomyces antarcticus</i>         |
| YE-124       | AB922847              | <i>Hannaella siamensis</i> (AB922844)      | 0/0/597                                | 100        | <i>Hannaella siamensis</i> <sup>a</sup> |
| YE-126       | LC498444              | <i>Rhodotorula taiwanensis</i> (GU646863)  | 0/0/574                                | 100        | <i>Rhodotorula taiwanensis</i>          |
| YE-127       | LC498445              | <i>Papiliotrema flavescens</i> (AB035042)  | 0/0/545                                | 100        | <i>Papiliotrema flavescens</i>          |
| YE-128       | LC498446              | <i>Kalmanozyma vetiver</i> (AB809649)      | 0/0/606                                | 100        | <i>Kalmanozyma vetiver</i>              |
| YE-129       | LC498447              | <i>Sporobolomyces blumeae</i> (AB279628)   | 0/0/537                                | 100        | <i>Sporobolomyces blumeae</i>           |
| YE-130       | LC498448              | <i>Moesziomyces antarcticus</i> (AB089359) | 0/0/611                                | 100        | <i>Moesziomyces antarcticus</i>         |
| YE-135       | LC498449              | <i>Papiliotrema japonica</i> (AF444760)    | 0/0/604                                | 100        | <i>Papiliotrema japonica</i>            |
| YE-136       | LC498450              | <i>Dirkmeia churashimaensis</i> (AB548955) | 0/0/575                                | 100        | <i>Dirkmeia churashimaensis</i>         |
| YE-137       | LC498451              | <i>Rhodotorula paludigena</i> (AF070424)   | 0/0/581                                | 100        | <i>Rhodotorula paludigena</i>           |
| YE-138       | LC498452              | <i>Sporobolomyces blumeae</i> (AB279628)   | 0/0/543                                | 100        | <i>Sporobolomyces blumeae</i>           |
| YE-140       | LC498453              | <i>Moesziomyces antarcticus</i> (AB089359) | 0/0/612                                | 100        | <i>Moesziomyces antarcticus</i>         |
| YE-141       | LC498454              | <i>Papiliotrema japonica</i> (AF444760)    | 0/0/567                                | 100        | <i>Papiliotrema japonica</i>            |
| YE-142       | LC498455              | <i>Moesziomyces antarcticus</i> (AB089359) | 0/0/612                                | 100        | <i>Moesziomyces antarcticus</i>         |
| YE-144       | LC498456              | <i>Sporobolomyces blumeae</i> (AB279628)   | 0/0/544                                | 100        | <i>Sporobolomyces blumeae</i>           |
| YE-145       | LC498457              | <i>Papiliotrema japonica</i> (AF444760)    | 0/0/603                                | 100        | <i>Papiliotrema japonica</i>            |
| YE-147       | LC498458              | <i>Rhodotorula paludigena</i> (AF070424)   | 0/0/581                                | 100        | <i>Rhodotorula paludigena</i>           |
| YE-148       | LC498459              | <i>Rhodotorula taiwanensis</i> (GU646863)  | 1/0/574                                | 99.8       | <i>Rhodotorula taiwanensis</i>          |
| YE-149       | LC498460              | <i>Dirkmeia churashimaensis</i> (AB548955) | 0/0/578                                | 100        | <i>Dirkmeia churashimaensis</i>         |
| YE-151       | LC498461              | <i>Moesziomyces antarcticus</i> (AB089359) | 0/0/611                                | 100        | <i>Moesziomyces antarcticus</i>         |
| YE-153       | LC498462              | <i>Sporobolomyces blumeae</i> (AB279628)   | 0/0/578                                | 100        | <i>Sporobolomyces blumeae</i>           |

Table S1. *continued.*

| Yeast strain | GenBank accession no. | Closest species                             | Nucleotide substitutions/gap/ total nt | % identity | Identification                                                    |
|--------------|-----------------------|---------------------------------------------|----------------------------------------|------------|-------------------------------------------------------------------|
| YE-154       | LC498463              | <i>Blastobotrys arbuscula</i> (U40108)      | 2/0/544                                | 99.6       | <i>Blastobotrys arbuscula</i>                                     |
| YE-155       | LC486518              | <i>Vishniacozyma taibaiensis</i> (AY557601) | 8/0/602                                | 98.7       | Potential new species closest to <i>Vishniacozyma taibaiensis</i> |
| YE-156       | AB922848              | <i>Hannaella siamensis</i> (AB922844)       | 3/1/598                                | 99.3       | <i>Hannaella siamensis</i> <sup>a</sup>                           |
| YE-157       | LC498464              | <i>Dirkmeia churashimaensis</i> (AB548955)  | 0/0/578                                | 100        | <i>Dirkmeia churashimaensis</i>                                   |
| YE-160       | LC498465              | <i>Papiliotrema flavescens</i> (AB035042)   | 1/0/570                                | 99.8       | <i>Papiliotrema flavescens</i>                                    |
| YE-161       | LC498466              | <i>Jaminaea angkorensis</i> (EU587489)      | 1/1/592                                | 99.7       | <i>Jaminaea angkorensis</i>                                       |
| YE-162       | LC498467              | <i>Dirkmeia churashimaensis</i> (AB548955)  | 0/0/578                                | 100        | <i>Dirkmeia churashimaensis</i>                                   |
| YE-164       | LC498468              | <i>Hyphopichia burtonii</i> (U45712)        | 0/2/526                                | 99.6       | <i>Hyphopichia burtonii</i>                                       |
| YE-165       | LC498469              | <i>Wickerhamomyces edaphicus</i> (AB436763) | 2/6/573                                | 98.6       | <i>Wickerhamomyces edaphicus</i>                                  |
| YE-166       | LC498470              | <i>Candida wangnamkhiaoensis</i> (AB682910) | 1/0/553                                | 99.8       | <i>Candida wangnamkhiaoensi</i>                                   |
| YE-169       | LC498471              | <i>Trichosporon asteroides</i> (AF075513)   | 1/0/569                                | 99.8       | <i>Trichosporon asteroides</i>                                    |
| YE-170       | LC006026              | <i>Yamadazyma epiphylla</i> (LC006026)      | 0/0/518                                | 100        | <i>Yamadazyma epiphylla</i> <sup>b</sup>                          |
| YE-171       | LC486514              | <i>Rhodotorula mucilaginoso</i> (AF070432)  | 2/0/541                                | 99.6       | <i>Rhodotorula mucilaginoso</i>                                   |
| YE-172       | LC498472              | <i>Moesziomyces antarcticus</i> (AB089359)  | 0/0/611                                | 100        | <i>Moesziomyces antarcticus</i>                                   |
| YE-175       | LC498473              | <i>Rhodotorula mucilaginoso</i> (AF070432)  | 1/0/538                                | 99.8       | <i>Rhodotorula mucilaginoso</i>                                   |

<sup>a</sup> Kaewwichian et al. (2015)<sup>b</sup> Jindamorakot et al. (2015)



**Table S2.** Sequence similarity analysis of the ITS region of corn phyloplane isolates showing  $\geq 2$  nucleotide substitutions in the D1/D2 region.

| Strain     | GenBank accession no. of D1/D2, ITS region | Closest species                                                              | Nucleotide substitutions/ gap/total nt |            | Identification                                                    |
|------------|--------------------------------------------|------------------------------------------------------------------------------|----------------------------------------|------------|-------------------------------------------------------------------|
|            |                                            |                                                                              | D1/D2 region                           | ITS region |                                                                   |
| YE-71      | LC486513, LC486527                         | <i>Dirkmeia churashimaensis</i> OK96 <sup>T</sup> (AB548955, AB548947)       | 3/2/569                                | 4/4/602    | <i>Dirkmeia churashimaensis</i>                                   |
| DMKU-RP167 | LC486505, LC486519                         | <i>Moesziomyces antarcticus</i> CBS5955 <sup>T</sup> (KY108571, AB089358)    | 3/0/541                                | 3/0/684    | <i>Moesziomyces antarcticus</i>                                   |
| DMKU-RP11  | LC486506, LC486520                         | <i>Rhodotorula taiwanensis</i> CBS 11729 <sup>T</sup> (GU646863, NR_157462)  | 2/0/538                                | 1/1/583    | <i>Rhodotorula taiwanensis</i>                                    |
| DMKU-RP37  | LC486507, LC486521                         | <i>Rhodotorula taiwanensis</i> CBS 11729 <sup>T</sup> (GU646863, NR_157462)  | 2/1/503                                | 1/0/573    | <i>Rhodotorula taiwanensis</i>                                    |
| DMKU-RP38  | LC486508, LC486522                         | <i>Rhodotorula toruloides</i> CBS 349 (AF070426, AF444489)                   | 3/1/559                                | 1/0/578    | <i>Rhodotorula toruloides</i>                                     |
| DMKU-RP29  | LC486509, LC486523                         | <i>Rhodotorula toruloides</i> CBS 349 (AF070426, AF444489)                   | 5/0/556                                | 5/4/584    | Potential new species closest to <i>Rhodotorula toruloides</i>    |
| DMKU-RP53  | LC486510, LC486524                         | <i>Rhodotorula toruloides</i> CBS 349 (AF070426, AF444489)                   | 5/0/557                                | 5/4/585    | Potential new species closest to <i>Rhodotorula toruloides</i>    |
| DMKU-RP158 | LC486511, LC486525                         | <i>Rhodotorula mucilaginoso</i> JCM 8115 <sup>T</sup> (AF070432, AF444541)   | 2/0/534                                | 2/1/596    | <i>Rhodotorula mucilaginoso</i>                                   |
| YE-171     | LC486514, LC486532                         | <i>Rhodotorula mucilaginoso</i> JCM 8115 <sup>T</sup> (AF070432, AF444541)   | 2/0/541                                | 2/0/599    | <i>Rhodotorula mucilaginoso</i>                                   |
| DMKU-RP02  | LC486512, LC486526                         | <i>Saitozyma flava</i> CBS 331 <sup>T</sup> (AF075497, AF444338)             | 2/1/575                                | 3/0/498    | <i>Saitozyma flava</i>                                            |
| YE-32      | LC486515, LC486528                         | <i>Sporidiobolus pararoseus</i> CBS 491 <sup>T</sup> (AF189977, NR_155770)   | 2/0/579                                | 2/1/572    | <i>Sporidiobolus pararoseus</i>                                   |
| YE-60      | LC486516, LC486529                         | <i>Sporidiobolus pararoseus</i> CBS 491 <sup>T</sup> (AF189977, NR_155770)   | 2/0/578                                | 2/1/576    | <i>Sporidiobolus pararoseus</i>                                   |
| YE-107     | LC486517, LC486530                         | <i>Sporidiobolus pararoseus</i> CBS 491 <sup>T</sup> (AF189977, NR_155770)   | 3/0/577                                | 2/1/572    | <i>Sporidiobolus pararoseus</i>                                   |
| YE-155     | LC486518, LC486531                         | <i>Vishniacozyma taibaiensis</i> CBS 9919 <sup>T</sup> (AY557601, NR_144810) | 8/0/602                                | 21/7/499   | Potential new species closest to <i>Vishniacozyma taibaiensis</i> |

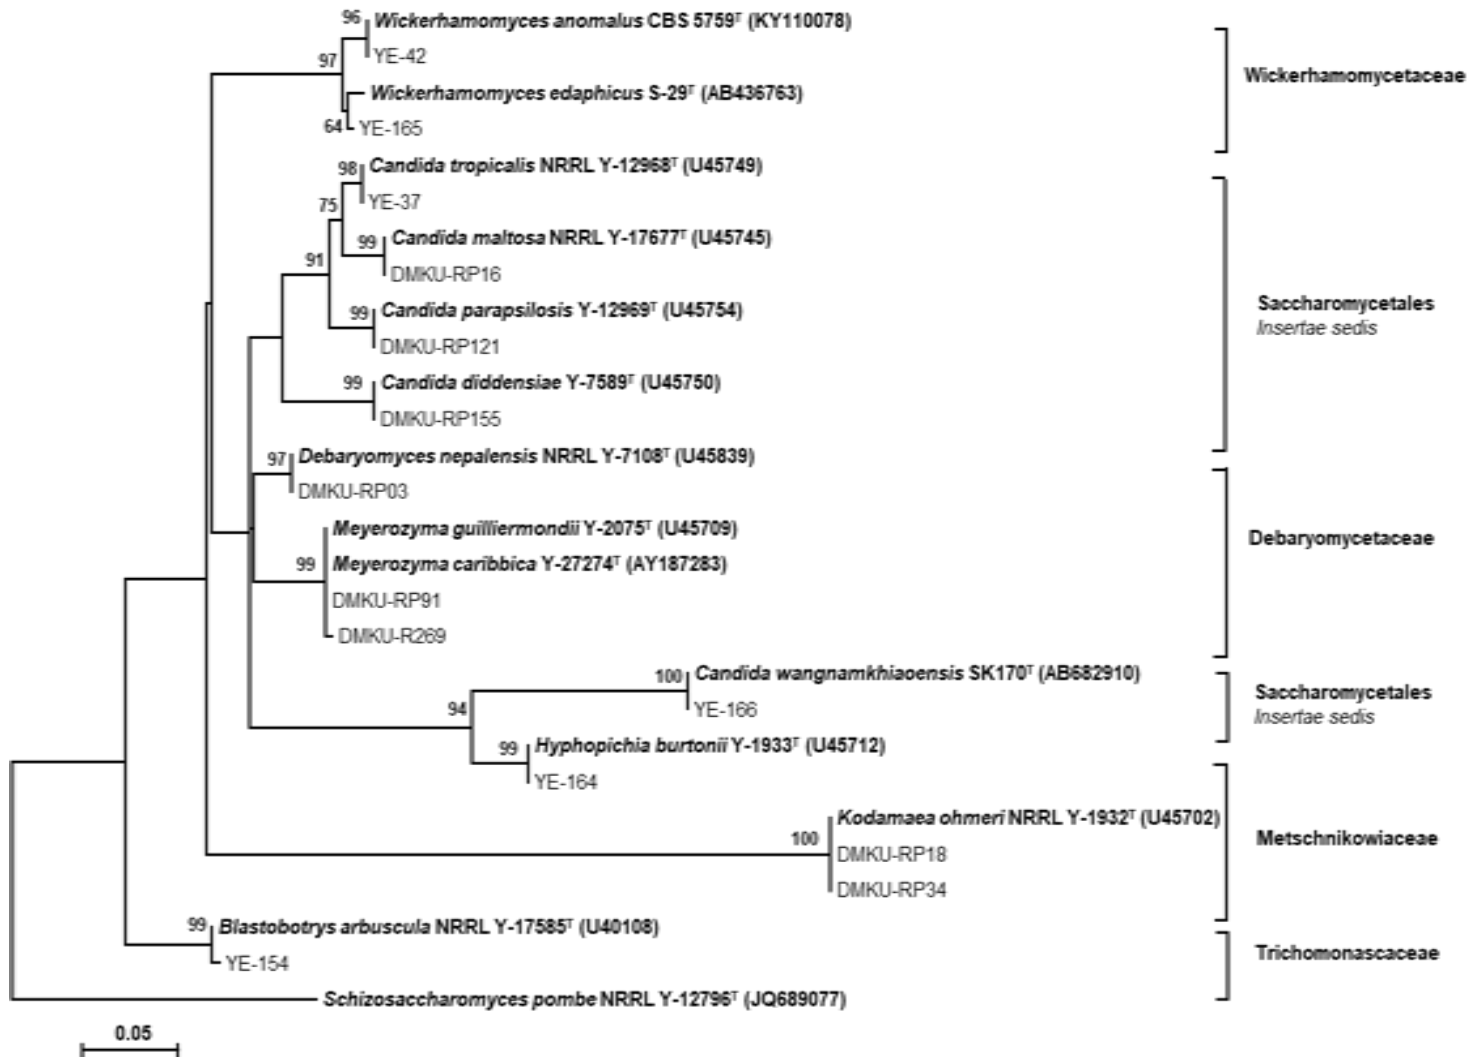

**Figure S1.** Phylogenetic relationship of the sequences of the D1/D2 region of the LSU rRNA gene of yeast strains isolated from the phylloplane of rice belonged to the Phylum Ascomycota, subphylum Saccharomycotina and their closely related yeast sequences retrieved from the GenBank database calculated from maximum-likelihood using GTR model. Number on branches represent the bootstrap percentage (>50%) from 1,000 random replications. The scale bar corresponds to a genetic distance of 0.05 substitutions per position.

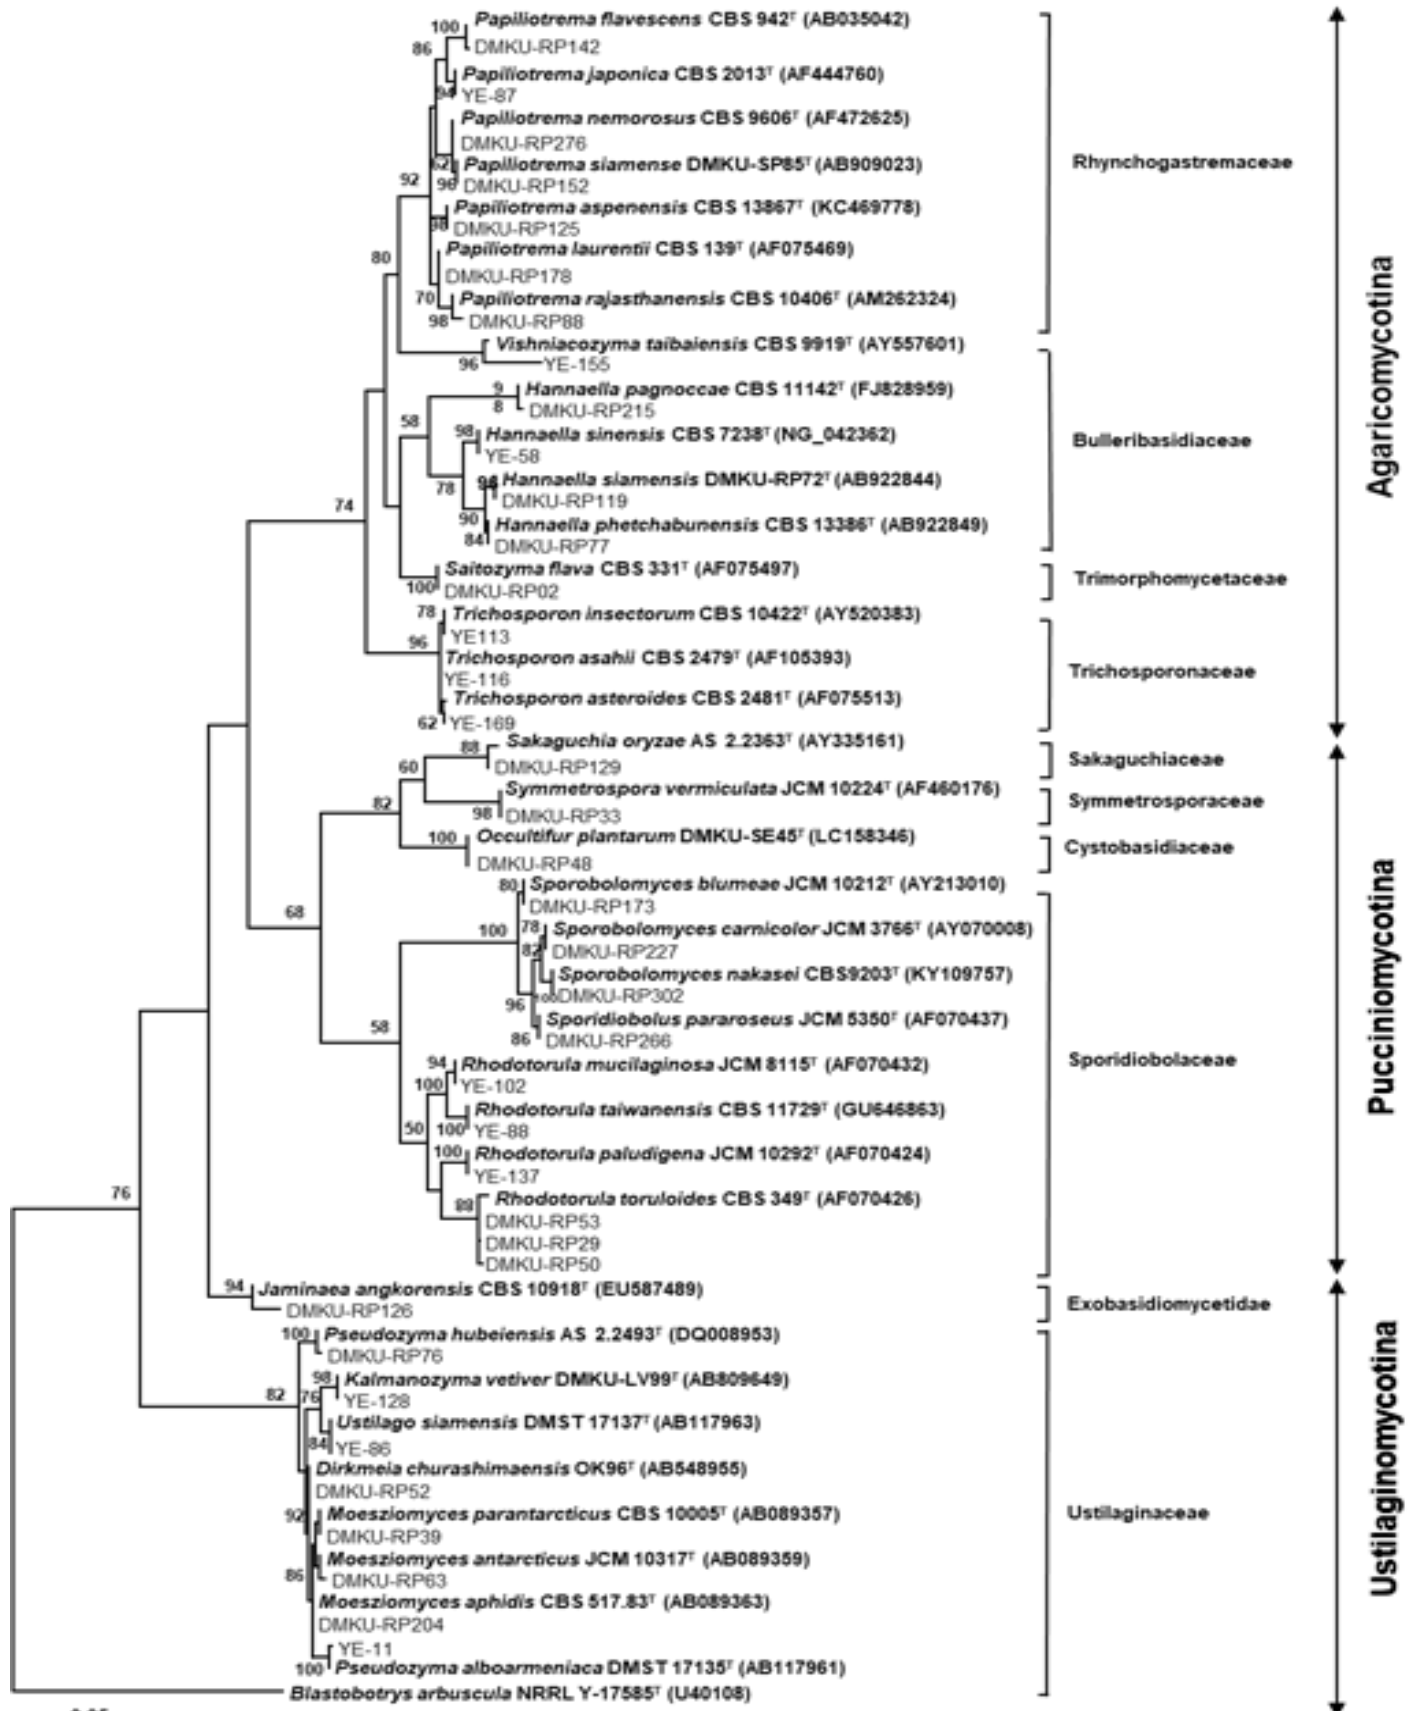

**Figure S2.** Phylogenetic relationship of the sequences of the D1/D2 region of the LSU rRNA gene of yeast strains isolated from the phylloplane of rice belonged to phylum Basidiomycota and their closely related yeast sequences retrieved from the GenBank database calculated from maximum-likelihood using GTR model. Number on branches represent the bootstrap percentage (>50%) from 1,000 random replications. The scale bar corresponds to a genetic distance of 0.05 substitutions per position.
